# Supplementary material for: Proteome dynamics of cold-acclimating Rhododendron species contrasting in their freezing tolerance and thermonasty behavior
Source: PubMed Central journal article supplement (PMC5441609; doi:10.1371/journal.pone.0177389), 2017-05-23
Supplement: pone.0177389.s001.pdf [file pone.0177389.s001.pdf]

# (1) Sample preparation

*R. catawiense*

*R. ponticum*

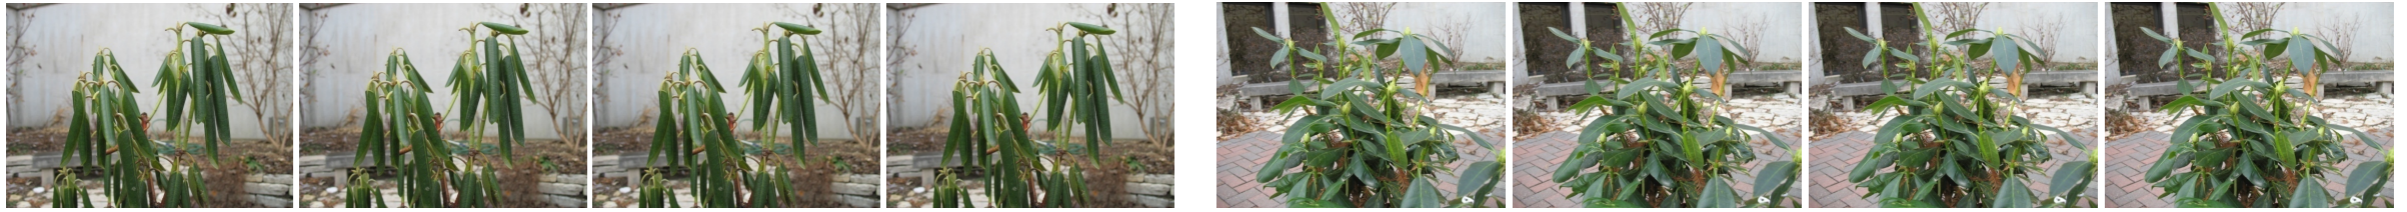

mid-August (NA)  
Sampling Pool

late-December (CA)  
Sampling Pool

late-December (CA)  
Sampling Pool

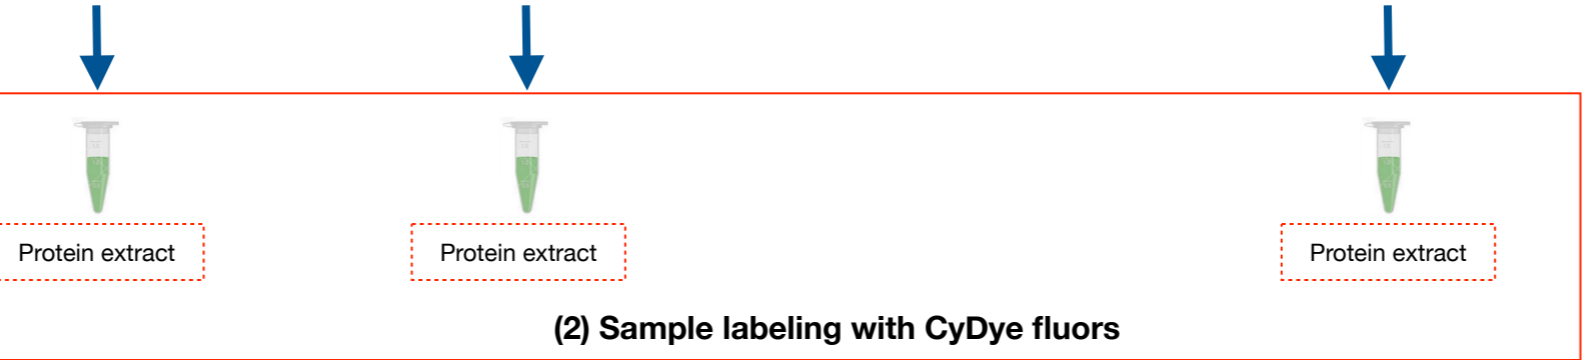

# (2) Sample labeling with CyDye fluors

# (3) 2D Gel Electrophoresis

Mix labeled extracts

Mix labeled extracts

Mix labeled extracts

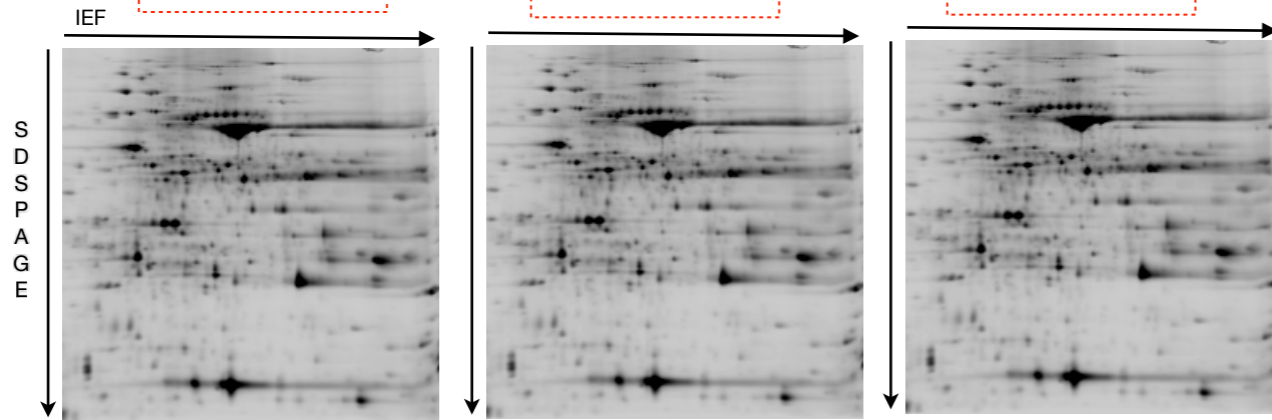

# (4) Image Analysis

Excitation wavelength 1

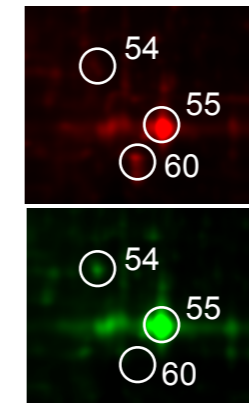

Overlay Images

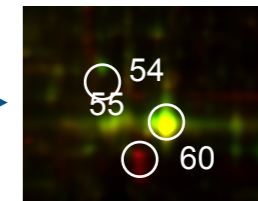

Excitation wavelength 2

# (5) In-gel analysis of differences

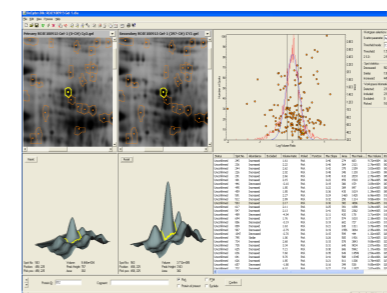

# (5) Quantitative analysis + Spot picking

# (6) Protein Identification by MS

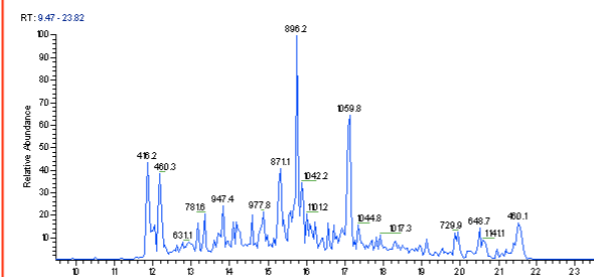

# (6) Protein Identification by MS
